# Supplementary material
Source: publisher figshare collection journal article supplement (https://f1000.figshare.com/ndownloader/files/1529623)
Supplement: Supplementary file 1 [file 1529623]

exponentially grown cells,germinated spores
7.79,5.02
13.07,10.63
13.99,10.02
4.86,5.32
2.5,
6.23,
5.16,
